# Supplementary material
Source: PubMed Central journal article supplement (PMC5963547)
Supplement: Supp_Figure1.pdf [file Supp_Figure1.pdf]

## Supplementary Data

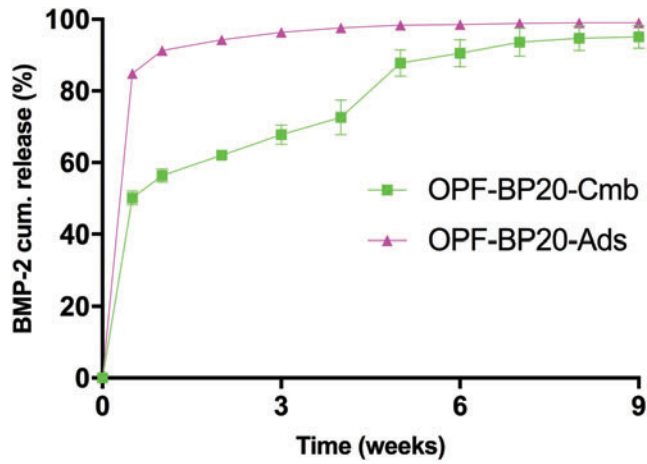

**SUPPLEMENTARY FIG. 1.** *In vivo* BMP-2 release kinetics shown in% BMP-2 retention. OPF-BP20-Cmb: OPF hydrogel modified with 20% Bis(2-(methacryloyloxy)ethyl) phosphate (BP). Cmb: 50% of the BMP-2 encapsulated in poly(lactic-co-glycolic acid) microspheres and 50% adsorbed on the composite. Ads: 100% of the BMP-2 adsorbed on the composite.<sup>16</sup>
